# Supplementary material for: Species Diversity and Community Composition of Macroinvertebrates in Headwater Streams of Two Subtropical Neighboring Lowland Basins
Source: MDPI journal article supplement (doi:10.3390/d14050402), 2022-05-20
Supplement: s1 [file s1]

Supplementary

Table S1 Correlations between the first two PCA axes (PC1 and PC2) and chemical variables. \* indicate  $p < 0.05$  and \*\* indicate  $p < 0.01$ .

|     | TN     | NO <sub>3</sub> | NO <sub>2</sub> | NH <sub>4</sub> | TP              | PO <sub>4</sub> | SiO <sub>2</sub> | Chl             | mmHg            | DO     | Cond           | pH     | ORP mv |
|-----|--------|-----------------|-----------------|-----------------|-----------------|-----------------|------------------|-----------------|-----------------|--------|----------------|--------|--------|
|     | (mg/L) | (mg/L)          | (mg/L)          | (mg/L)          | (mg/L)          | (mg/L)          | (mg/L)           | (mg/L)          | (mg/L)          | (mg/L) | (mg/L)         |        |        |
| PC1 | 0.530* | -0.267          | -0.457          | -0.296          | -0.511*         | -0.493*         | -0.591*          | -0.494*         | <b>-0.695**</b> | 0.164  | <b>-0.77**</b> | 0.122  | 0.536* |
| PC2 | -0.358 | -0.314          | 0.054           | 0.362           | <b>-0.773**</b> | <b>-0.778**</b> | 0.189            | <b>-0.712**</b> | 0.508*          | -0.136 | 0.323          | 0.513* | -0.410 |

Table S2 Macroinvertebrate composition and abundances in streams of the Beijiang basin (BJ1-BJ9) and Dongjiang basin (DJ1-DJ8).

|                   | BJ1 | BJ2 | BJ3 | BJ4 | BJ5 | BJ6 | BJ7 | BJ8 | BJ9 | DJ1 | DJ2 | DJ3 | DJ4 | DJ5 | DJ6 | DJ7 | DJ8 |
|-------------------|-----|-----|-----|-----|-----|-----|-----|-----|-----|-----|-----|-----|-----|-----|-----|-----|-----|
| Philopotamidae    | 24  | 1   | 0   | 1   | 1   | 2   | 0   | 0   | 4   | 8   | 0   | 6   | 0   | 2   | 0   | 0   | 0   |
| Rhyacophilidae    | 10  | 1   | 5   | 2   | 0   | 0   | 0   | 0   | 0   | 0   | 0   | 0   | 0   | 0   | 0   | 0   | 0   |
| Hydropsychidae    | 93  | 32  | 32  | 6   | 0   | 62  | 1   | 0   | 10  | 8   | 20  | 53  | 0   | 21  | 17  | 19  | 0   |
| Polycentropodidae | 11  | 0   | 0   | 1   | 0   | 7   | 6   | 1   | 6   | 0   | 0   | 0   | 0   | 4   | 31  | 1   | 0   |
| Lepidostomatidae  | 3   | 0   | 60  | 22  | 5   | 5   | 5   | 1   | 3   | 22  | 10  | 5   | 7   | 1   | 5   | 68  | 0   |
| Glossosomatidae   | 1   | 0   | 0   | 21  | 22  | 10  | 0   | 0   | 0   | 2   | 33  | 1   | 0   | 0   | 0   | 0   | 0   |
| Ecnomidae         | 0   | 0   | 1   | 0   | 0   | 0   | 0   | 0   | 0   | 2   | 0   | 0   | 0   | 0   | 0   | 0   | 0   |
| Limnephilidae     | 0   | 0   | 0   | 2   | 0   | 2   | 0   | 6   | 3   | 0   | 0   | 0   | 0   | 0   | 1   | 0   | 0   |
| Psychomyiidae     | 0   | 0   | 0   | 1   | 0   | 0   | 0   | 0   | 0   | 8   | 5   | 2   | 0   | 0   | 9   | 6   | 1   |
| Leptoceridae      | 0   | 0   | 0   | 2   | 0   | 0   | 0   | 0   | 3   | 0   | 0   | 0   | 0   | 0   | 0   | 0   | 0   |
| Tanypodinae       | 38  | 2   | 41  | 12  | 53  | 0   | 4   | 0   | 20  | 1   | 17  | 9   | 10  | 7   | 13  | 5   | 4   |
| Orthoclaudiinae   | 171 | 12  | 96  | 25  | 16  | 17  | 69  | 7   | 16  | 5   | 10  | 0   | 2   | 5   | 0   | 0   | 0   |
| Chironominae      | 3   | 0   | 37  | 9   | 10  | 0   | 0   | 0   | 0   | 18  | 20  | 16  | 5   | 44  | 129 | 15  | 32  |
| Simuliidae        | 40  | 7   | 66  | 23  | 0   | 23  | 121 | 0   | 21  | 51  | 5   | 58  | 86  | 6   | 5   | 0   | 9   |
| Tipulidae         | 8   | 21  | 22  | 15  | 64  | 6   | 19  | 5   | 13  | 30  | 59  | 18  | 22  | 9   | 37  | 6   | 1   |
| Dolichopodidae    | 3   | 0   | 0   | 0   | 0   | 0   | 0   | 0   | 1   | 0   | 0   | 0   | 0   | 0   | 0   | 0   | 0   |
| Ceratopogonidae   | 0   | 0   | 1   | 0   | 0   | 0   | 0   | 0   | 0   | 1   | 0   | 0   | 0   | 0   | 10  | 0   | 0   |
| Dixidae           | 0   | 1   | 0   | 0   | 0   | 1   | 0   | 2   | 3   | 0   | 0   | 0   | 0   | 0   | 0   | 0   | 0   |
| Tabanidae         | 0   | 0   | 1   | 0   | 0   | 0   | 0   | 0   | 0   | 0   | 0   | 0   | 0   | 0   | 0   | 22  | 0   |
| Tabanidae         | 0   | 0   | 0   | 0   | 0   | 0   | 0   | 0   | 0   | 0   | 0   | 0   | 0   | 1   | 0   | 0   | 0   |
| Ephemeridae       | 26  | 78  | 10  | 5   | 30  | 7   | 1   | 108 | 69  | 143 | 18  | 100 | 0   | 9   | 29  | 24  | 5   |
| Heptageniidae     | 6   | 27  | 25  | 9   | 46  | 30  | 0   | 13  | 17  | 20  | 58  | 14  | 3   | 32  | 26  | 81  | 2   |
| Baetidae          | 83  | 29  | 175 | 60  | 10  | 54  | 2   | 12  | 11  | 41  | 95  | 23  | 159 | 25  | 33  | 62  | 2   |
| Isonychiidae      | 0   | 0   | 0   | 0   | 0   | 0   | 0   | 0   | 0   | 15  | 0   | 0   | 0   | 0   | 0   | 0   | 0   |
| Siphonuridae      | 0   | 0   | 0   | 1   | 135 | 0   | 0   | 0   | 0   | 0   | 0   | 0   | 0   | 0   | 0   | 0   | 4   |
| Ephemerellidae    | 1   | 6   | 2   | 25  | 0   | 5   | 0   | 13  | 4   | 44  | 22  | 9   | 13  | 8   | 11  | 4   | 5   |
| Leptophlebiidae   | 0   | 5   | 0   | 2   | 0   | 0   | 0   | 57  | 25  | 3   | 0   | 2   | 0   | 0   | 1   | 0   | 0   |
| Potamanthidae     | 0   | 0   | 0   | 0   | 0   | 1   | 0   | 0   | 0   | 0   | 0   | 0   | 0   | 0   | 0   | 0   | 0   |
| Nemouridae        | 15  | 49  | 21  | 0   | 0   | 0   | 0   | 0   | 0   | 32  | 9   | 13  | 7   | 6   | 17  | 5   | 0   |
| Chloroperlidae    | 0   | 0   | 2   | 1   | 2   | 1   | 1   | 4   | 1   | 1   | 8   | 0   | 0   | 4   | 1   | 3   | 2   |
| Perlidae          | 0   | 0   | 10  | 18  | 0   | 10  | 18  | 9   | 10  | 8   | 22  | 18  | 0   | 2   | 4   | 5   | 0   |
| Pteronarcyidae    | 0   | 0   | 4   | 0   | 5   | 2   | 0   | 0   | 0   | 0   | 0   | 0   | 0   | 0   | 0   | 0   | 0   |
| Capniidae         | 0   | 0   | 0   | 2   | 0   | 0   | 0   | 0   | 0   | 0   | 0   | 0   | 0   | 0   | 0   | 0   | 0   |
| Taeniopterygidae  | 0   | 0   | 0   | 0   | 0   | 2   | 0   | 5   | 1   | 0   | 0   | 0   | 0   | 0   | 0   | 0   | 0   |
| Perlodidae        | 0   | 0   | 0   | 0   | 0   | 0   | 1   | 0   | 2   | 0   | 0   | 0   | 0   | 0   | 0   | 0   | 0   |
| Calopterygidae    | 9   | 2   | 0   | 0   | 0   | 0   | 0   | 0   | 21  | 4   | 0   | 1   | 0   | 7   | 7   | 3   | 0   |
| Coenagrionidae    | 0   | 0   | 0   | 0   | 3   | 0   | 0   | 2   | 26  | 0   | 0   | 0   | 0   | 0   | 7   | 1   | 2   |
| Sialidae          | 1   | 0   | 1   | 1   | 0   | 1   | 0   | 6   | 0   | 0   | 2   | 1   | 0   | 0   | 0   | 0   | 0   |
| Corydalidae       | 0   | 0   | 0   | 0   | 0   | 0   | 0   | 0   | 0   | 0   | 6   | 0   | 1   | 2   | 1   | 1   | 0   |
| Gomphidae         | 1   | 6   | 4   | 1   | 0   | 3   | 0   | 0   | 12  | 2   | 2   | 5   | 1   | 0   | 0   | 1   | 1   |

[illegible]

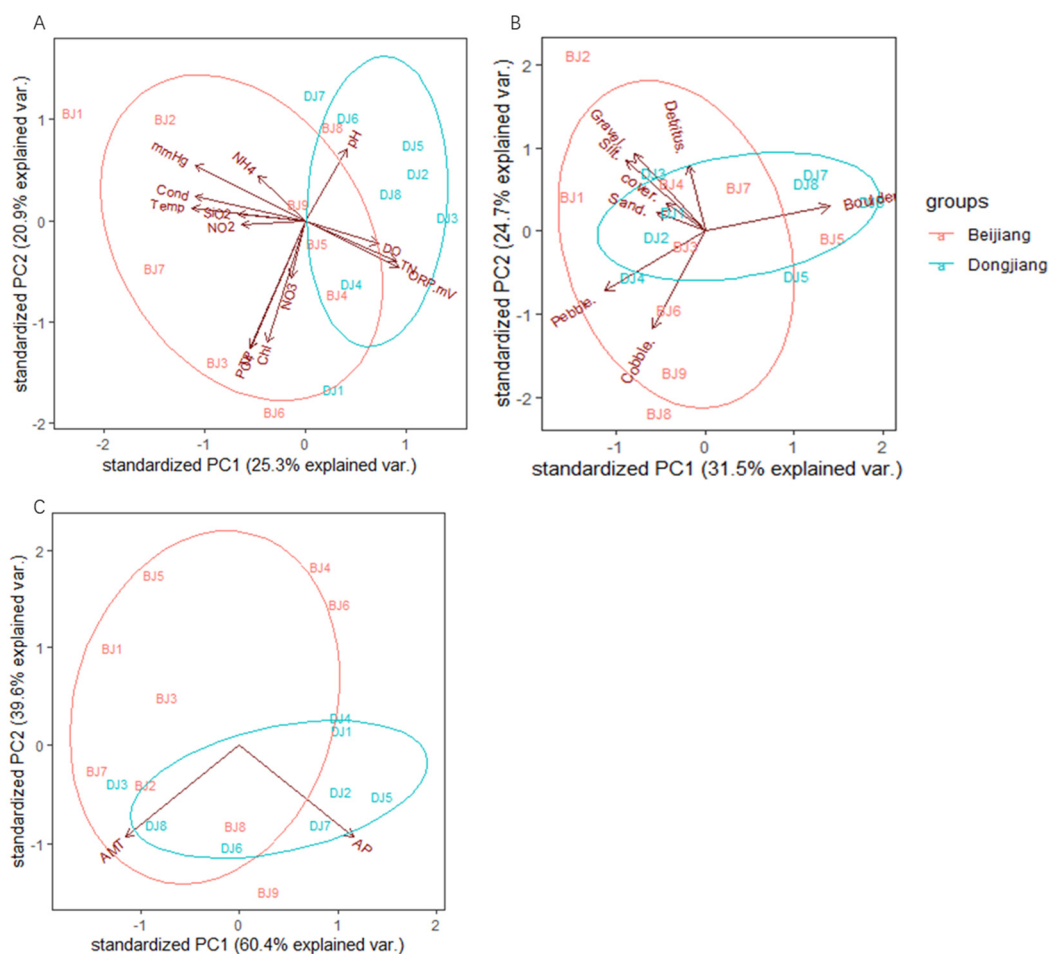

Figure S1 PCA plots of chemical variables (A), physical variables (B), and climatic variables (C). TN: total nitrogen;  $\text{NO}_3$ : nitrate;  $\text{NO}_2$ : nitrite;  $\text{NH}_4$ : ammonium; TP: total phosphorus;  $\text{PO}_4$ : phosphate;  $\text{SiO}_2$ : silicon dioxide; Chl: chlorophyll; DO: dissolved oxygen; Temp: water temperature; Cond: conductivity; AP: Annual Precipitation; AMT: Annual Mean Temperature.
